# Supplementary material for: Terminally functionalized polyisobutylene oligomers as soluble supports in catalysisElectronic supplementary information (ESI) available: experimental details for the synthesis and use of the PIB oligomers and catalysts. See http://www.rsc.org/suppdata/cc/b3/b312368e/
Source: Royal Society of Chemistry journal article supplement (doi:10.1039/b312368e), 2003-12-19
Supplement: b312368e.doc [file b312368e.doc]

Terminally Functionalized Polyisobutylene Oligomers as Soluble Supports in Catalysis

David E. Bergbreiter* and Jun Li

Department of Chemistry,P.O. Box 10034, Texas A&M University, College Station, Texas, USA. Fax: 001 979 845 4719; Tel: 001 979 845 3437; E-mail: bergbreiter@tamu.edu

**Experimental Section**

All reagents and solvents were obtained from commercial sources and used without purification unless otherwise stated. 1H NMR and 13C NMR spectra were obtained on a Varian XL200E. Infrared spectra were recorded using a Mattson Galaxy 4021 FT-IR spectrometer. Acid chloride[1], and the aniline containing SCS ligand[2] were synthesized according to the methods reported previously. The vinyl-terminated polyisobutylene oligomers (*M*w = 1000 or 2300) were supplied by BASF. They are commercially available at ca. 50 sources searchable using SciFinder (Registry Number 2003-97-4). While either size oligomer could be used in the chemistry below, the specific experimental descriptions are all of the *M*w 1000 oligomer.

**PIB-OH (2).** A sample of PIB 50 g (50 mmol) was dissolved in 100 mL of hexane and was allowed to react with 17 mmol of neat BH3-SMe. After a total reaction time of 24 h, the reaction mixture was cooled by ice-water bath and 40 mL of ethanol and 12 mL of 4 N NaOH were added, Oxidation to form the alcohol was accomplished by dropwise addition of 8 mL of 30% H2O2. The oxidation was allowed to proceed for 2 h, at which point 300 mL of H2O was added. The solution was extracted with hexane (5 x 100 mL), and then washed with H2O (3 x 50 mL) and brine (1 x 50 mL). The organic phase was dried over MgSO4, filtered and the organic solvents were removed under pressure. A total yield of 52 g product (PIB-OH) (**2**) (1.01 mmol of –OH/g of polymer) was obtained after drying under vacuum for 24 h. 1H NMR (300 MHz, CDCl3, ): 0.75-1.46 (m, 180H), 3.26-3.32 (dd, J = 7.5 Hz, 1H), 3.44- 3.49 (dd, J = 5.4 Hz, 1H).

**PIB-OMs (3).** The hydroxylated PIB (PIB-OH) (10 g) was dissolved in 100 mL of dichloromethane and cooled to 0 C. Then 2.32 mL of methanesulfonyl chloride and 4.32 mL of triethylamine were added dropwise. The reaction mixture was allowed to stir for 6 h after warming to room temperature. The solvent was removed under pressure and the residue was dissolved in 300 mL of hexane, washed first with H2O (3 x 30 mL) and then with 90% EtOH (4 x 50 mL). The organic phase was then dried over MgSO4, the MgSO4 was removed by filtration, and the solvent was removed under reduced pressure. A total yield of 10.48 g of product was obtained after drying under vacuum for 24 h. 1H NMR (300 MHz, CDCl3, ): 0.8-1.39 (m, 180H), 1.95 (m, 1H), 2.96 (s, 3H), 3.86 (dd, J = 7.8 Hz, 1H), 4.04 (dd, J = 5.4 Hz, 1H).

**PIB-CH(COOEt)2.** A solution of 1.6 g of Na in 100 mL of absolute ethanol was prepared. Then 11.35 mL of diethyl malonate was added and stirred at room temperature for 30 min. A second solution of 7 g of PIB-OMs in 50 mL of heptane was also prepared. The first solution (35 mL) was added to the second solution of the mesylate and the resulting mixture was heated to 80 C for 12 h. After cooling to room temperature, 200 mL of hexane was added, washed with H2O (2 x 30 mL), dried over Na2SO4. The solvent was removed under pressure, dried under vacuum for 24 h to give 6.5 g of product containing ca. 1.7 mmol of ester/g of polymer. 1H NMR (300 MHz, CDCl3, ): 0.88-1.39 (m, 180H), 1.58-1.76 (m, 2H), 1.88- 1.99 (m, 1H), 3.35-3.40 (dd, J = 6.3 Hz, 1H), 4.12-4.21 (m, 4H).

**PIB-CH(COOH)2.** A mixture of 6.5 g of PIB-CH(COOEt)2 and 2.6 g of sodium hydroxide was dissolved in a mixture of 50 mL of ethanol and 50 mL of heptane and the solution was heated to 80 C for 40 h. After cooling to room temperature, the solution was neutralized by concentrated HCl and 50 mL of H2O was added. The organic phase was separated and the water phase was extracted with hexane (3 x 50 mL). The combined hexane phase was washed with DMF (3 x 10 mL), 90% EtOH (3 x 10 mL), H2O (2 x 20 mL), and then dried over Na2SO4. The solvent was removed under pressure and the crude PIB-CH(CO2H)2 was dried under vacuum for 24 h to give 5.4 g of product containing ca. 1.86 mmol of –CO2H groups/g of polymer. 1H NMR  (300 MHz, CDCl3,) 0.76-1.48 (m, 180H), 1.98 (m, 2H), 3.49 (dd, J = 6.3 Hz, 1H); IR (neat, cm-1): 1722.

**PIB-CH2COOH (5).** A mixture of 5 g of PIB-CH(COOH)2 , 5 mL of conc. HCl, 5 mL of H2O in 50 mL of DMF and 50 mL of heptane was heated to 120 C for 40 h. After cooling to room temperature, the reaction mixture separated into a heptane phase and a DMF phase. The DMF phase was extracted with additional hexane (3 x 30 mL). The combined heptane and hexane phases were washed by H2O (2 x 20 mL), brine (20 mL), and dried over Na2SO4. The solvents were removed under pressure and dried under vacuum for 24 h to give 4 g product containing 0.97 mmol of –CO2H groups/g of poly. 1H NMR (300 MHz, CDCl3, ): 0.84-1.76 (m, 180H), 2.30-2.36 (m, 2H).

**PIB-CH2CONH(CH2)3PPh2 (6).** A sample of 2 g of PIB-CH2COOH (**5**) was dissolved in 20 mL of dichloromethane. Then 0.091 mL of ethyl chloroformate and 0.105 mL of *N*-methylmorpholine were added. The system was sealed and any oxygen in the vial was removed by 5 freeze pump thaw cycles. A sample of 0.211 g of diphenylphosphinepropylamine (DPPA) was added, and then the reaction mixture was stirred for 24 h at room temperature. The solvent was removed by vacuum at room temperature and 15 mL of deoxygenated hexane was added. After washing this solution with 90% EtOH (2 x 8 mL) and drying (Na2SO4), the solvent was removed under pressure. The crude product was dried under vacuum for 24 h to give 1.9 g of product containing ca. 0.81 mmol of –PPh2 groups/g of polymer. 1H NMR  (300 MHz, CDCl3,) 0.81-1.65 (m, 180H), 2.00-2.12 (m, 2H), 3.28-3.35 (m, 6H), 7.29-7.40 (m, 10H). 31P NMR  (CDCl3,) -15.83.

**(PIB-CH2CONH(CH2)3PPh2)4Pd(0)**. A solution of 9.15 mg of Pd2(bda)3 (0.01 mmol) in 10 mL of THF was prepared under N2 and added to a solution of PIB-CH2CONH(CH2)3PPh2 (**6**) (0.08 mmol) in 2 mL of heptane also prepared under nitrogen. Within 5 min the resulting solution changed from dark purple to golden yellow. Then the solution was stirred for 1 h and the solvent was removed under pressure to give polymer-supported Pd(0) catalyst that was used without further purification in the reactions below.

**General procedure for the Sonogashira reaction catalyzed by (PIB-PPh2)4Pd.** A solution of iodobenzene (2 mmol), phenylacetylene (3 mmol), triethylamine (6 mmol), and CuI (0.08 mmol) in 10 mL of 90% EtOH was prepared. After 5 freeze pump thaw cycles, a solution of **7** in 10 mL of heptane (0.02 mmol of Pd, 0.08 mmol of PIB-phosphine) was added to this 90% EtOH solution. The resulting biphasic system was heated to 75 C. This heating and stirring led to complete miscibilization. After 36 h, the system was cooled to room temperature to induce phase separation. The lower EtOH-rich phase was removed by forced siphon with a cannula. Removal of the solvent followed by purification with silica gel chromatography yielded the diphenylacetylene product. Catalyst recycling was effected by adding a fresh 90% EtOH solution of the reactants and re-heating the system. Three cycles were run for each reaction.

**General procedure for allylic substitutions catalyzed by (PIB-PPh2)4Pd.** A solution of cinnamyl actate (2 mmol) morpholine (3 mmol), triethylamine (6 mmol) in 10 mL of absolute EtOH was prepared and the vial was sealed. The air was removed by 5 freeze pump thaw cycles and a solution of **7** in 10 mL of heptane (0.02 mmol of Pd, 0.08 mmol of PIB-phosphine) was added to this EtOH solution. After 20 h of stirring at room temperature, 1 – 1.3 mL of water was added to induce phase separation. The lower EtOH-rich phase was removed by forced siphon through a cannula. Solvent removal followed by chromatography with silica gel yielded the pure allylic amine product. Catalyst recycling was affected by adding a fresh absolute EtOH solution of the reactants to the heptane-rich catalyst phase. Five cycles were run for each reaction.

**PIB-Br (4).** First, 10 g of PIB-OH was dissolved in 100 mL of dichloromethane and cooled to 0 C, 2.32 mL of methanesulfonyl chloride and 4.32 mL of triethylamine were added dropwise. The reaction mixture was allowed to stir for 6 h after warming to room temperature. The solvent was removed under pressure and then the residue was dissolved in a mixture of 100 mL of heptane and 100 mL of acetone that contained 9 g of LiBr. After heating this reaction mixture at 80 C for 24 h, the product bromide formed. The product was isolated by first cooling to room temperature. Then 200 mL of hexane was added and washed successively with H2O (1 x 50 mL), DMF (5 x 10 mL), and again with H2O (2 x 20 mL). After drying over Na2SO4, the solvent was removed under vacuum to yield 9.4 g of product containing ca. 0.95 mmol of –Br groups/g of polymer. 1H NMR (300 MHz, CDCl3, ): 0.76-1.49(m, 180H), 3.28 (dd, J = 6.9 Hz, 1H), 3.37 (dd, J = 4.8 Hz, 1H).

**PIB-dicyclopentylphosphine-borane.** First, 1 g of dicyclopentylphosphine-borane was dissolved in 10 mL of freshly distilled THF. This solution was cooled to -78 C and 3.8 mL of 1.6 *M* *n*-BuLi in hexane was added by syringe. The lithiated dicyclopentylphosphine formed after stirring this mixture first at -78 °C for 2 h and then at room temperature for 6 h. The reaction mixture was cooled to -78C and a solution of 2 g of PIB-Br in 10 mL of freshly distilled THF was added by cannula. The reaction mixture was stirred at this temperature for 2 h and finally at room temperature for 12 h. The solvent was removed under reduced pressure and the resulting mixture was taken up in 100 mL of diethyl ether, washed by H2O (2 x 20 mL), dried over MgSO4, and the solvent was removed under reduced pressure. The residue was then dissolved in 100 mL of hexane, washed by DMF (3 x 10 mL), 90% EtOH (5 x 10mL), and dried (Na2SO4). After solvent removal and silica gel chromatography (hexane/EtOAc: 10/1, v/v) 1.8 g of product was obtained containing ca. 0.87 mmol of –P(C5H9)2-BH3 groups/g of polymer. 1H NMR (300 MHz, CDCl3, ): 0.81-1.39 (m, 180H), 1.52-2.05 (m, 18H)

31P NMR (CDCl3, ): 25.98

**PIB-dicyclopentylphosphine (7).** A solution of 0.8 g of PIB-dicyclopentylphosphine in 10 mL of freshly distilled THF and 10 mL of diethylamine was prepared. The vial was sealed and the air in the vial was removed by 5 freeze pump thaw cycles. Then the reaction mixture was heated to 55 C for 24 h. After cooling to room temperature, the solvent was removed under reduced pressure. The residue was dissolved to 15 mL of hexane and washed with 90% EtOH (2 x 5 mL) and dried over Na2SO4. Removal of the solvent and vacuum drying produced 0.6 g of product containing ca. 0.88 mmol of –P(C5H9)2 groups/g of polymer. 31P NMR (C6D6, ): -11.06.

**PIB-methyl red-labeled polymer (9).** First, 1.8 g of PIB-OH was dissolved in 50 mL of toluene and allowed to react with a mixture of 0.5 g of the acid chloride derivative of methyl red in the presence of 1 mL of pyridine. After a 24 h reflux, the solvent was removed under pressure. The residue was taken up 300 mL of hexane and washed with 90% EtOH (10 x 30 mL). The organic phase was dried over MgSO4, the solvents were removed under pressure and then dried under vacuum for 24 h to give 1.67 g product (**9**) as red colored liquid. IR (neat, cm-1): 2953, 2889, 2263, 1710, 1606, 1517, 1477, 1397, 1373, 1277, 1245, 1141, 916, 740; 1H NMR (300 MHz, CDCl3, δ): 0.80-1.43 (m, 180H), 2.06 (m, 1H), 3.07 (s, 6H), 4.01-4.07 (dd, J = 7.8Hz, 1H), 4.17-4.23 (dd, J = 5.7 Hz, 1H), 6.71 (d, J = 9.3 Hz, 2H), 7.86 (t, J = 9.3 Hz, 4H), 8.17 (d, J = 8.7 Hz, 2H).

**PIB-SS-ligand.** First, 2 g of PIB-COOH was dissolved in 25 mL of dichloroethane. Then 0.01 mL of ethylchloroformate and 0.012 mL of *N*-methylmorpholine were added. After stirring for 30 min, 0.0397g of the aniline derivative of the dithioether ligand was added. The reaction mixture was stirred for 20 h at room temperature and then at 60 °C for 12 h. The dichloroethane was removed under pressure. The residue was taken up 150 mL of hexane, washed with 90% EtOH (3 x 20 mL), and dried over MgSO4. The solvents were removed under pressure and the residue was dried under vacuum for 24 h to give 1.77 g of the product containing ca. 0.74 mmol of the dithioether ligand/g of polymer. 1H NMR (300MHz, CDCl3, δ): 0.85-1.41 (m, 180H), 3.74 (s, 6H), 3.87 (s, 4H), 6.77 (d, J = 8.7 Hz, 4H), 7.13 (s, 1H), 7.20 (d, J = 8.7 Hz, 4H) and 7.27 (s, 2H).

**PIB-SCS-Pd(10).** First the PIB-dithioether ligand (1.20 g) was dissolved in 20 mL of THF. Then a solution of 0.0665 g of Pd(TFA)2 in 5 mL of THF was added. After stirring the reaction mixture at room temperature for 24 h, the solvent was removed under pressure. The residue was taken up 150 mL of hexane, washed with 90% EtOH (4 x 30 mL), and the hexane solution was dried over MgSO4. The solvents were removed under pressure and the residue was dried under vacuum for 24 h to give 0.9038 g product containing ca. 0.7 mmol of the Pd/g of polymer. 1H NMR (300 MHz, CDCl3, δ): 0.87-1.45 (m, 180H), 3.84 (s, 6H), 4.25 (s, 4H), 6.90 (d, J = 8.7 Hz, 4H), 7.22 (s, 2H), 7.75 (d, J = 8.7 Hz, 4H); 13C NMR (CDCl3, δ): 149.31.

**General procedure for Heck Reaction catalyzed by 10.** In a screw cap vial, 2 mL of a heptane solution of the PIB-SCS-Pd catalyst (6.0 mg/mL) was diluted to 5 mL with additional heptane. Iodobenzene (2 mmol) and a Heck acceptor (methylacrylate, 3 mmol) and a base (Et3N, 6 mmol) were dissolved in 10 mL of DMA and added to this first vial. The reaction was heated at ca. 100°C for 24 h. After the reaction, the vial was cooled and the layers were allowed to separate. The lower DMA phase containing the product was then removed; recycling simply involved adding fresh reactants in fresh DMA to the heptane solution of the catalyst for the next cycle.

References.

1. D. E. Bergbreiter, J. R. Blannton, R. Chandran, M. D. Hein, K. –J. Huang, D. R. Treadwell, S. A. Walker, *J. Polym. Sci.: Part A: Polym. Chem*., 1989, **27**, 4205.
2. D. E. Bergbreiter, P. L. Osburn, A. Wilson, E. M. Sink, *J. Am. Chem. Soc*., 2000, **122**, 9058.
